# **The genetic architecture of *Arabidopsis thaliana* in response to native non-pathogenic leaf bacterial species revealed by GWA mapping in field conditions**

Daniela Ramírez-Sánchez<sup>¶</sup>, Rémi Duflos<sup>¶</sup>, Chrystel Gibelin-Viala, Rémy Zamar, Fabienne Vailleau\* and Fabrice Roux\*

LIPME, INRAE, CNRS, Université de Toulouse, Castanet-Tolosan, France

<sup>¶</sup>These authors have contributed equally to this work and share first authorship.

\* The authors share senior authorship.

\* Corresponding author: [fabrice.roux@inrae.fr](mailto:fabrice.roux@inrae.fr) (F. Roux)

**Competing Interests:** The authors declare that there are no competing financial interests in relation to the work described

1 **ABSTRACT**

2 Non-pathogenic bacteria can largely contribute to plant health by mobilizing and supplying  
3 nutrients and by providing protection against pathogens and resistance to abiotic stresses. Yet,  
4 the number of GWAS reporting the genetic architecture of the response to individual members  
5 of the beneficial microbiota remains limited. In this study, we established a GWAS under field  
6 conditions to estimate the level of genetic variation and the underlying genetic architecture,  
7 among 162 accessions of *Arabidopsis thaliana* originating from 54 natural populations located  
8 south-west of France, in response to 13 strains of seven of the most abundant and prevalent  
9 non-pathogenic bacterial species isolated from the leaf compartment of *A. thaliana* in the same  
10 geographical region. Using a high-throughput phenotyping methodology to score vegetative  
11 growth-related traits, extensive genetic variation was detected within our local set of *A. thaliana*  
12 accessions in response to these leaf bacteria, both at the species and strain levels. The presence  
13 of crossing reaction norms among strains indicates that declaring a strain as a plant-growth  
14 promoting bacterium is highly dependent on the host genotype tested. In line with the strong  
15 genotype-by-genotype interactions, we detected a complex and highly flexible genetic  
16 architecture between the 13 strains. Finally, the candidate genes underlying the QTLs revealed  
17 a significant enrichment in several biological pathways, including cell, secondary metabolism,  
18 signalling and transport. Altogether, plant innate immunity appears as a significant source of  
19 natural genetic variation in plant-microbiota interactions and opens new avenues for better  
20 understanding the ecologically relevant molecular dialog during plant-microbiota interactions.

## 21 INTRODUCTION

22 Both wild plant species and crops are consistently challenged by pathogens, making infectious  
23 disease often the major selective agent in nature [1–5]. In wild species, pathogen attacks can  
24 significantly decrease the number of offspring, which in turn affects host population growth  
25 rate [6–8]. Yield losses resulting from pathogen attacks can reach several tens of percent in  
26 crops [9–12], thereby threatening global food security [10, 13]. A major challenge in plant  
27 breeding and in ecological genomics is therefore to characterize the genetic architecture of  
28 response to pathogen attacks [14, 15]. Identifying the genetic and molecular bases for natural  
29 variation in response to pathogen attacks might lead to fundamental insights in the prediction  
30 of evolutionary trajectories of natural populations [16–19] and have enormous practical  
31 implications by increasing crop yield and quality [20–22].

32 Over the last decade, whole-genome sequencing made possible through the development of  
33 cutting-edge next-generation sequencing (NGS) technologies, combined with the development  
34 of increasingly sophisticated statistical methods in quantitative genetics [23, 24], led to a burst  
35 in the number of genome-wide association studies (GWAS) that were successful in both wild  
36 and cultivated plants. This allowed detecting genomic regions associated with natural variation  
37 of response to experimental inoculation with, in most cases, individual pathogenic strains [15,  
38 25–27]. GWAS in plants revealed that the genetic architecture of response to pathogen attacks  
39 was highly polygenic [15], highly dependent on the abiotic environment [28, 29] and dynamic  
40 along the infection stages [28, 30]. In addition, the functional validation of few quantitative trait  
41 loci (QTLs) combined with transcriptomic analyses revealed both the involvement of a broad  
42 range of rarely considered molecular functions in plant immunity [17, 31, 32] as well as a new  
43 biomolecular network of the signaling machineries underlying disease resistance [33–35].

44 However, the entire set of microbial pathogens - also called pathobiota - represent only a small  
45 fraction of the entire set of microbes inhabiting plants, the so-called plant microbiota [14, 36,

37]. For instance, in the leaf compartment of 163 natural populations of *Arabidopsis thaliana* located in the south-west of France and characterized for bacterial communities using a metabarcoding approach allowing distinguishing pathogenic bacteria from other bacterial species [38], the relative abundance of pathobiota in microbiota was on average 1.6% in asymptomatic plants and 4.5% in plants with visible disease symptoms [38]. Furthermore, microbiota can largely contribute to plant health by (i) providing direct (production of antimicrobial components, niche competition) or indirect (triggering immune defense) protection against pathogens, (ii) mobilizing and provisioning nutrients, and (iii) providing resistance to abiotic stresses (such as drought) [37, 39–46]. Yet, the number of GWAS reporting the genetic architecture of the response to experimental inoculation with individual members of the beneficial microbiota remains limited in comparison to the number of GWAS on response to pathogens. In addition, despite the fact that the phyllosphere represents 60% of the total biomass on Earth and concentrating  $10^{26}$  bacteria (Vorholt, 2012), most GWAS conducted in response to non-pathogenic bacteria focused on symbiotic bacteria or non-symbiotic plant-growth promoting bacteria (PGPB) at the below-ground level and in laboratory controlled conditions [47–52].

In this study, we established a GWAS under field conditions to estimate the level of genetic variation and the underlying genetic architecture, among 162 whole-genome sequenced accessions of *A. thaliana* originating from 54 natural populations located south-west of France, in response to 13 strains of seven of the most abundant and prevalent bacterial species isolated from the leaf compartment of *A. thaliana* in the same geographical region [53]. To do so, we first developed a high-throughput phenotyping methodology to score vegetative growth-related traits on tens of thousands of plants. We then combined GWA mapping derived from a Bayesian hierarchical model (BHM) [54], with a local score (LS) approach [55] to fine map QTLs down to the gene level, a combination that was successfully applied to detect and/or functionally

71 validate QTLs involved in biotic interactions in *A. thaliana* [28, 30, 55, 56]. We finally  
72 identified the main biological pathways associated with all the candidate genes and discussed  
73 the function of the main candidate genes.

74

## 75 **MATERIAL AND METHODS**

### 76 **Plant material**

77 A total of 54 populations (each represented by three accessions) were chosen to represent both  
78 the genomic and ecological diversity identified among a set of 168 natural populations of *A.*  
79 *thaliana* located southwest of France [57, 58] (Supplementary Table S1). Seeds from maternal  
80 plants sampled in natural populations were collected in June 2016. Differences in the maternal  
81 effects among the 162 seed lots were reduced by growing one plant of each accession for one  
82 generation (Supplementary Text).

83

### 84 **Bacterial material**

85 We considered two strains of seven (*i.e.* OTU2, OTU3, OTU4, OTU5, OTU6, OTU13 and  
86 OTU29) out of the 12 most abundant and prevalent non-pathogenic leaf bacterial OTUs  
87 identified across the 168 natural populations of *A. thaliana* [38], with the exception of OTU4  
88 for which only one strain was available [53]. Based on whole-genome sequencing, the closest  
89 taxonomic classification for OTU2, OTU3, OTU4, OTU5, OTU6, OTU13 and OTU 29 was  
90 *Paraburkholderia fungorum*, *Oxalobacteraceae* bacterium, *Comamonadaceae* bacterium,  
91 *Pseudomonas moraviensis*, *Pseudomonas siliginis*, *Methylobacterium* sp. and  
92 *Sphingomonadaceae* bacterium, respectively [53]. For the purpose of another study, we also  
93 included the strain JACO-CL of the bacterial pathogen *Pseudomonas viridiflava* (OTU8),  
94 which is with *Xanthomonas campestris* the most abundant and prevalent bacterial pathogen  
95 across the 168 natural populations of *A. thaliana* [58].

## 96 **Experimental design and growth conditions**

97 A field experiment of 15,552 plants was set up at the INRAE center of Auzeville-Tolosane  
98 using a split-plot design arranged as a randomized complete block design (RCBD) with 16  
99 treatments nested within six experimental blocks (Figure S1). The 16 treatments correspond to  
100 two mock treatments and the individual inoculation of 14 bacterial strains, namely  
101 OTU2\_*Pfu*\_1, OTU2\_*Pfu*\_2, OTU3a\_*Oxa*\_1, OTU3a\_*Oxa*\_2, OTU4\_*Com*\_1, OTU5\_*Pmo*\_1,  
102 OTU5\_*Pmo*\_2, OTU6\_*Psi*\_1, OTU6\_*Psi*\_2, OTU13\_*Msp*\_1, OTU13\_*Msp*\_2, OTU29\_*Sph*\_1,  
103 OTU29\_*Sph*\_2 and OTU8\_JACO-CL. Each block was represented by 48 trays of 54 individual  
104 bottom-pierced wells ( $\varnothing$ 4.7 cm, vol.  $\sim$ 70 cm<sup>3</sup>) (SOPARCO, reference 4920) filled with  
105 PROVEEN® Semi-Bouturage 2. In each block, each treatment corresponded to three trays  
106 stuck to each other and containing 162 plants, with one replicate per accession (54 populations  
107 \* 3 accessions). Randomization of accessions was kept identical among treatments within a  
108 block, but differed among the six blocks. Randomization of the 16 treatments differed between  
109 the six blocks, with the exception of the two mock treatments that were kept at the same position  
110 (Supplementary Figure S1).

111 All seeds were sown on March 18<sup>th</sup> 2021, with several seeds sown in each well. Two weeks  
112 after sowing, seedlings were thinned to one per well, keeping the seedling the closest to the  
113 center of the well. During the entire growing period, the plants were watered as needed, *i.e.*  
114 manual watering morning and evening on hot and dry days and no watering on rainy days. A  
115 molluscicide (Algoflash® Naturasol) was regularly applied around the trays.

116

## 117 **Inoculation procedure**

118 Bacterial strains were grown on solid medium in Petri dishes (TSA for OTUs 5, 6 and 8, TSB  
119 for OTU2, R2A for OTUs 3, 4 and 29, R2A for OTU13). The day of inoculation, bacterial  
120 colonies were resuspended in sterile deionized water and bacterial solutions were diluted to

121 reach an OD<sub>600 nm</sub> of 0.1. To facilitate the penetration of bacteria cells into plant organs, the  
122 Tween® 20 surfactant was added to each bacterial solution at a final concentration of 0.01%.  
123 Inoculation was performed 27 days after sowing (April 14, 2021), when most plants reached a  
124 5-6 leaf stage. Using a Multipette® with a Combitips advanced® 50 mL, a volume of 1 mL of  
125 inoculum was dispensed on each rosette. A volume of 1mL of sterile water with a Tween®  
126 concentration of 0.01% was dispensed on each rosette of the plants of the two mock treatments.  
127 In order to increase relative humidity, plants were watered with a water mist spray system the  
128 seven days following the inoculation.

129

### 130 **Phenotyping**

131 Following [59], a non-destructive imaging approach (Supplementary Figure S2) was used to  
132 measure each plant for nine traits related to vegetative growth (Supplementary Data Set 1):  
133 projected rosette surface area measured at 1day before inoculation (dbi) (**area-1dbi**), 5 days  
134 after inoculation (dai) (**area-5dai**) and 9 dai (**area-9dai**); rosette perimeter measured at 1 dbi  
135 (**perimeter-1dbi**), 5 dai (**perimeter-5dai**) and 9 dai (**perimeter-9dai**); maximal rosette  
136 diameter measured at 1 dbi (**diameter-1dbi**), 5 dai (**diameter-5dai**) and 9 dai (**diameter-9dai**).  
137 To estimate plant growth relative to size, three relative growth rates (RGR) were estimated  
138 based on the rosette surface area: RGR between 5 dai and 1 dbi (**RGR-5dai-1dbi**), RGR  
139 between 9 dai and 5 dai (**RGR-9dai-5dai**) and RGR between 9 dai and 1 dbi (**RGR-9dai-1dbi**).  
140 The procedure and methodologies are detailed in Supplementary Text.

141

142

### 143 **Data analyses**

144 For the purpose of this study, the strain JACO-CL (OTU8, *P. viridiflava*) was not considered  
145 in any data analysis.

146 *Investigation of the extent of natural genetic variation*

147 To test the homogeneity of plant growth across the field trial and the presence of genetic  
148 variation for the three vegetative growth related traits measured before inoculation, data from  
149 the two mock treatments were pooled and the following mixed model (PROC MIXED  
150 procedure in SAS v. 9.4, SAS Institute Inc., Cary, NC, USA) was then used:

$$151 \quad Y_{ijklmn} = \mu_{trait} + Block_i + Treatment_j + Block_i * Treatment_j + Population_k + \\ 152 \quad Population_k * Treatment_j + Line_l(Tray_n) + Column_m(Tray_n) + \varepsilon_{ijklmn} \text{ (Model 1)}$$

153 where Y is one of the three phenotypic traits measured before inoculation (*i.e.* area-1dbi,  
154 perimeter-1dbi and diameter-1dbi),  $\mu$  is the overall mean of the phenotypic data, ‘Block’  
155 accounts for differences in micro-environmental conditions among blocks, ‘Line(Tray)’ and  
156 ‘Column(Tray)’ accounts for difference in micro-environmental conditions within 54-well  
157 trays, ‘Treatment’ tests for difference among the 14 treatments (*i.e.* mock treatment and 13  
158 treatments with non-pathogenic bacterial strains), ‘Population’ corresponds to the genetic  
159 differences among the 54 populations, ‘Population\*Treatment’ tests whether the rank among  
160 the 54 populations differs among the 14 treatments, and ‘ $\varepsilon$ ’ is the residual term.

161 While the terms ‘Treatment’ and ‘Population\*Treatment’ were not significant, we detected a  
162 highly significant ‘Population’ effect (Supplementary Table S2), thereby indicating that the  
163 level of significant genetic variation observed among the 54 populations was homogeneous  
164 across the field trial before inoculation.

165 To estimate the natural genetic variation of the response of the 162 accessions nested within 54  
166 populations to the 13 non-pathogenic bacterial strains, the following mixed model (PROC  
167 MIXED procedure in SAS v. 9.4, SAS Institute Inc., Cary, NC, USA) was used for each of the  
168 15 treatments:

$$169 \quad Y_{ijklm} = \mu_{trait} + Block_i + Population_j + Accession_k(Population_j) + Line_l(Tray_i) \\ 170 \quad + Column_m(Tray_i) + \varepsilon_{ijklm} \text{ (Model 2)}$$



171 where Y corresponds to one of the nine traits (area-5dai, area-9dai, perimeter-5dai, perimeter-  
172 9dai, diameter-5dai, diameter-9dai, RGR-5dai-1dbi, RGR-9dai-5dai and RGR-9dai-1dbi). All  
173 the terms are identical to the ones described in Model (1), with the exception of ‘Accession’  
174 that accounts for mean genetic differences among the three accession within populations.  
175 For each of the 126 ‘phenotypic trait \* treatment’ combinations (*i.e.* nine traits \*14 treatments),  
176 genotypic values of the 54 populations were estimated by calculating least-squares (LS) mean  
177 values of the term ‘Population’ by the following linear model (PROC MIXED procedure in  
178 SAS v. 9.4, SAS Institute Inc., Cary, NC, USA) was used:

$$179 \quad Y_{ijkl} = \mu_{trait} + Block_i + Population_j + Line_k(Tray_l) + Column_l(Tray_l) + \varepsilon_{ijkl} \text{ (Model 3)}$$

180 For each of the nine phenotypic traits, the estimated genotypic values (Supplementary Data Set  
181 2) were then used to (i) compare phenotypic variation among the 14 treatments, (ii) estimate  
182 the level of ‘Population\*Treatment’ interactions by calculating pairwise non-linear correlation  
183 coefficients (Spearman’s *rho*) among the 14 treatments, and (iii) run GWA analyses (see  
184 below).

185 To estimate broad-sense heritability values ( $H^2$ ) for each of the 126 ‘phenotypic trait \*  
186 treatment’ combinations, the following linear model (PROC MIXED procedure in SAS v. 9.4,  
187 SAS Institute Inc., Cary, NC, USA) was used:

$$188 \quad Y_{ijkl} = \mu_{trait} + Block_i + Accession_j + Line_k(Tray_l) + Column_l(Tray_l) + \varepsilon_{ijkl} \text{ (Model 4)}$$

189 After considering the effects of the terms ‘Line(Tray)’ and ‘Column(Tray)’, the percentage of  
190 phenotypic variance explained by each other term of Model 4 was estimated by the PROC  
191 VARCOMP procedure (REML method, SAS v. 9.4, SAS Institute Inc., Cary, NC, USA).  
192 Following [33],  $H^2$  values were estimated using the following formula:

$$193 \quad H^2_{Trait} = \frac{VF}{VF + \frac{VR}{N}}$$

194 where ‘VF’ corresponds to the genetic variance among the 162 accessions, “VR” is the residual  
195 variance, and ‘N’ is the mean number of biological replicates per accession (N = 6 in this study).

196 In Models 1, 2, 3 and 4, all factors were treated as fixed effects. For calculating  $F$ -values, terms  
197 were tested over their appropriate denominators. A correction for the number of tests was  
198 performed to control the False Discover Rate (FDR) at a nominal level of 5%.

199

#### 200 *Combining GWA mapping with a local score approach (GW-LS)*

201 Based on a Pool-Seq approach, a representative picture of within-population genetic variation  
202 was previously obtained for 168 natural populations of *A. thaliana* located southwest of France  
203 [58], leading to the estimation of standardized allele frequencies corrected for the effect of  
204 population structure within each population for 1,638,649 SNPs across the genome [57, 58].  
205 For the purpose of this study, standardized population allele frequencies were retrieved for the  
206 54 populations. Then, for each of the 126 ‘phenotypic trait \* treatment’ combinations, a genome  
207 scan was first launched by estimating for each SNP Spearman’s  $\rho$  and associated  $p$  values  
208 between standardized allele frequencies and population genotypic values. Thereafter, to  
209 increase (i) the resolution in fine mapping genomic regions associated with genetic variation in  
210 response to bacterial strains, and (ii) the identification of QTLs with small effects, we followed  
211 [28, 30, 55, 56] by implementing a local score approach (with tuning parameter  $\xi = 2$ ) on these  
212  $p$  values. Finally, significant SNP-phenotype associations were identified by estimating a  
213 chromosome-wide significance threshold for each chromosome [55].

214

#### 215 *Enrichment in biological processes*

216 A custom script written under the *R* environment [56] was used to retrieve the candidate genes  
217 underlying detected QTLs for each of the 126 ‘phenotypic trait \* treatment’ combinations. For  
218 each of the 14 treatments, we merged the lists of candidate genes of the nine phenotypic traits  
219 and removed duplicates. For each of the 13 treatments with a non-pathogenic bacterial strain,  
220 only candidate genes not found in the mock treatment were kept. To identify biological

221 pathways significantly over-represented ( $P < 0.01$ ), each of the 14 resulting lists of unique  
222 candidate genes were submitted to the classification SuperViewer tool on the university of  
223 Toronto website ([http://bar.utoronto.ca/ntools/cgibin/ntools\\_classification\\_superviewer.cgi](http://bar.utoronto.ca/ntools/cgibin/ntools_classification_superviewer.cgi))  
224 using the MAPMAN classification.

225

## 226 **RESULTS**

### 227 **Genetic variation of *Arabidopsis thaliana* in response to non-pathogenic bacterial strains** 228 **in field conditions**

229 In agreement with previous experiments conducted in *in vitro* conditions [53], no disease  
230 symptoms were observed in our field conditions. For each of the 14 treatments (mock treatment  
231 and 13 treatments with a non-pathogenic bacterial strain), highly significant genetic variation  
232 was detected both between the 54 populations (Figure 1, Supplementary Figure S3,  
233 Supplementary Table S3) and between the 162 accessions (Supplementary Table S4) for each  
234 of the nine phenotypic traits, with the exception of (i) the rosette perimeter at 9 dai in presence  
235 of OTU3a\_*Oxa*\_1 at the population level (Supplementary Table S3), and (ii) the rosette area at  
236 9 dai in presence of OTU5\_*Pmo*\_1 and OTU6\_*Psi*\_1 at the accession level (Supplementary  
237 Table S4). Across the 126 ‘phenotypic trait \* treatment’ combinations, the mean broad-sense  
238 heritability ( $H^2$ ) estimate was 0.49 (median = 0.56, quantile 5% = 0.16, quantile 95% = 0.70).  
239 These results indicate that a non-negligible fraction of phenotypic variance was explained by  
240 genetic variation among populations and accessions (Supplementary Table S4).

241 A significant variation was observed among the 14 treatments for each phenotypic trait (Figure  
242 1, Supplementary Figure S3). However, significant differences between the response to any  
243 bacterial strain and the mock treatment were only observed for three traits (*i.e.* area-9dai,  
244 diameter-9dai and RGR-5dai-1dbi) (Figure 1, Supplementary Figure S3). For instance, the  
245 rosette area at 9 dai was on average bigger and smaller in response to

246 OTU2\_*Pfu*\_1/OTU3a\_*Oxa*\_2 and OTU29\_*Sph*\_2 than in the mock treatment, respectively  
247 (Figure 1a). The relative growth rate between 5 dai and 1 dbi was significantly higher in  
248 response to OTU5\_*Pmo*\_2 than in seven treatments, including the mock treatment (Figure 1b).  
249 More importantly, for each phenotypic trait, we observed a strong genetic variation among the  
250 54 populations in their response to each of the 13 non-pathogenic bacterial strains (Figure 2,  
251 Supplementary Figure 4). Indeed, values of genetic correlations between the mock treatment  
252 and each treatment with a bacterial strain were largely deviating from 1, in particular at 9 dai  
253 (Figure 2a), with the exception of relative growth rate for with lower values of genetic  
254 correlations were observed within 5 dai than within 9 dai (Figure 2b, Supplementary Figure  
255 S4). In addition, the response of the 54 populations greatly varied among the 13 bacterial strains,  
256 even between two strains belonging to the same bacterial species (Figure 2, Supplementary  
257 Figure 4). For instance, while most populations present either a positive, neutral or negative  
258 response to either OTU13\_*Msp* strain (*i.e.* presence of crossing reaction norms), the direction  
259 and/or the strength of response of given population can largely differ between the two  
260 OTU13\_*Msp* strains, as illustrated by the populations FERR-A and LUZE-B (Figure 3).

261 Altogether, the presence of (i) genetic variation at the population and accession levels for most  
262 ‘phenotypic trait \* treatment’ combinations, (ii) crossing reaction norms between the mock  
263 treatment and each treatment with a bacterial strain, and (ii) crossing reaction norms among the  
264 13 treatments with a bacterial strain, suggests a genetic architecture that largely differs among  
265 the 14 treatments, whatever the phenotypic trait considered.

266

## 267 **A genomic map of local adaptation to prevalent and/or abundant leaf bacterial species**

268 Based on the allele frequencies of 1,638,649 SNPs obtained by a Pool-Seq approach for each  
269 of the 54 populations (Frachon et al., 2018), a GWA mapping analysis combining a Bayesian  
270 hierarchical model with a local score approach (BMH-LS) was conducted to characterize the

271 genetic architecture of response to the 13 non-pathogenic bacterial strains. Across the 126  
272 ‘phenotypic trait \* treatment’ combinations, we detected 2,064 QTLs with a mean length of  
273 QTL interval equal to ~837bp (quantile 5% ~ 38bp, quantile 95% = 3.12kb) (Supplementary  
274 Data Set 3). The number of QTLs per ‘phenotypic trait \* treatment’ combination ranged from  
275 6 to 34 (mean =16.4), suggesting a polygenic architecture for the response to members of the  
276 most prevalent and/or abundant non-pathogenic bacterial species of the leaf compartment of *A.*  
277 *thaliana* located south-west of France (Figure 4a).

278 In agreement with the level of genetic correlations observed among the 14 treatments (mock  
279 treatment and 13 treatments with a non-pathogenic bacterial strain) and the presence of crossing  
280 reaction norms (Figures 2 and3, Supplementary Figures S3 and S4), the genetic architecture  
281 was highly flexible between the mock treatment and treatments with bacterial strains, as well  
282 as among treatments with bacterial strains at the interspecific and intraspecific levels, as  
283 illustrated for the rosette area at 9 dai (Figure 5). For instance, most candidate genes underlying  
284 detected QTLs and not shared with the mock treatment were specific to a given treatment with  
285 a bacterial strain (Figure 4b, Supplementary Figure 5, Supplementary Data Set 4), in particular  
286 at 9 dai (Figure 4b, Supplementary Figure 5). For instance, for the maximal rosette diameter,  
287 while the percentage of candidate genes specific to a given treatment with a bacterial strain  
288 ranged from 57.7% to 86.1% (mean = 75.2%) at 9 dai, it ranged from 26.9% to 81.1% (mean =  
289 46.0%) at 5 dai (Supplementary Figure 5).

290

291 **Identification of enriched biological processes and candidate genes associated with the**  
292 **response to prevalent and/or abundant leaf bacterial species**

293 The first approach to identify relevant candidate genes involved in the response to the 13 non-  
294 pathogenic bacterial species was to focus on candidate genes underlying the most pleiotropic  
295 QTLs. Here, we focused on QTLs detected for the response in more than six bacterial strains,

296 but not detected for the mock treatment. We identified seven such pleiotropic QTLs  
297 encompassing 17 candidate genes (Table 1, Supplementary Data Set 5). In agreement with the  
298 highly flexible genetic architecture observed between strains within a bacterial species (Figure  
299 4b, Supplementary Figure 5), the high level of pleiotropy observed for these QTLs was more  
300 dependent on the identity of the bacterial strains than the identity of the bacterial species (Table  
301 1). Among the 17 candidate genes, eight genes have functions in relation with plant  
302 development and organ growth, *i.e.* *At2g40650* [60], *At2g40670* [61, 62], *At2g44710* [63],  
303 *At2g47190* [64–66], *At4g14713* [67–70], *At4g14716* [71], *At4g14720* [72] and *At5g42360* [73].  
304 Interestingly, three genes have a link with plant immunity, *i.e.* the genes *MEMB12* (*At5g50440*)  
305 that is silenced by a microRNA during *Pseudomonas syringae* bacterial infection [74], *ARR16*  
306 (*At2g40670*) that is repressed by *Botrytis cinerea* fungal infection [75], and *TIFY4B/PEAPOD*  
307 *2* (*At4g14720*) that interacts with the begomovirus AL2 transcriptional activator protein, an  
308 inhibitor of plant basal defense [76].  
309 Based on the lists of unique candidate genes identified for each treatment and the list of unique  
310 candidate genes identified across the 13 treatments with a bacterial strain, the second approach  
311 was to identify biological processes significantly over-represented in frequency compared to  
312 the overall class frequency in the *A. thaliana* MapMan annotation. When considering both the  
313 14 treatments individually and the 13 treatments with a bacterial strain altogether, we identified  
314 19 significantly enriched classes, among which five were also enriched in the mock treatment,  
315 *i.e.* ‘development’, ‘hormone metabolism’, ‘lipid metabolism’, ‘protein’ and ‘RNA’ (Figure 6a,  
316 Supplementary Data Set 5). Amongst the 14 over-represented classes not detected in the mock  
317 treatment, most of them were highly dependent on the identity of the bacterial strain, suggesting  
318 the involvement of diverse pathways in response to representative members of the non-  
319 pathogenic microbiota down to the intraspecific level (Figure 6a). We nonetheless identified  
320 four classes that were significantly over-represented for at least three treatments with a bacterial

321 strain and when considering the 13 treatments with a bacterial strain altogether, *i.e.* ‘cell’,  
322 ‘secondary metabolism’, ‘signalling’ and ‘transport’ (Figure 6a). Interestingly, amongst the 99  
323 ‘signalling’ genes, we identified (i) 54 kinase-related genes including 24 leucine-rich repeat  
324 (LRR) kinases, 8 cysteine-rich receptor-like kinases (CRK) and 6 MAP kinases, and (ii) 23  
325 genes associated with calcium signalling, in particular for the two strains of *P. fungorum*  
326 (OTU2), the two strains of *Oxalobacteraceae* bacterium (OTU3) and one strain of *P. siliginis*  
327 (OTU6) (Figure 6b).

328

## 329 **DISCUSSION**

### 330 **Extensive genetic variation within a local set of *A. thaliana* accessions in response to non-** 331 **pathogenic leaf bacteria at the species and strain levels**

332 Extensive genetic variation was previously observed in two worldwide collections of *A.*  
333 *thaliana*, each challenged at the root level in *in vitro* conditions with a single PGPB strain  
334 isolated on another plant species than *A. thaliana*, *i.e.* the strain *Pseudomonas simiae* WCS417r  
335 isolated from the rhizosphere of wheat [47] and the strain *Bacillus pumilus* TUAT-1 isolated  
336 from rice roots [49]. In this study, in line with the need to bring evolutionary and ecological  
337 functional genomics from the lab to the wild [23, 77–79], the ecological realism of plant-  
338 microbiota interactions was increased by phenotyping in field conditions, the rosette growth  
339 response of *A. thaliana* accessions collected south-west of France to non-pathogenic bacterial  
340 strains isolated from the leaf compartment of *A. thaliana* in the same geographical region.

341 In agreement with previous observations with bacterial pathogens [15, 31, 80], the extent of  
342 genetic variation of response to non-pathogenic bacterial strains was more dependent on the  
343 identity of the bacterial strain than the identity of the bacterial species. In addition, the presence  
344 of crossing reaction norms indicates that declaring a strain as a PGPB is highly dependent on  
345 the host genotype tested. Whether the genotype-dependent plant-growth promoting effect of a



346 particular strain on aboveground vegetative growth is also observed at the below-ground level  
347 would deserve investigation, for instance by estimating root growth and root/shoot biomass  
348 ratios [81, 82].

349 Interestingly, while genetic variation in response to bacterial strains was observed within few  
350 days after inoculation in field conditions, such a genetic variation was mainly observed after  
351 several weeks in *in vitro* conditions [53]. Since the bacterial strains used in this study have been  
352 isolated from complex microbiota they used to interact and/or coevolve with in the native  
353 habitats of *A. thaliana*. Hence, the effect of bacterial strains may require the presence of  
354 additional microbiota members in the plant, a prerequisite not achieved in germ-free plants in  
355 *in vitro* conditions [53].

356

### 357 **A complex and highly flexible genetic architecture underlies adaptive plant-microbiota** 358 **interactions**

359 So far, the five GWAS [83–86] and the single genome-environment association study (GEAS)  
360 (Roux et al. 2022) conducted on the leaf compartment and using bacterial community  
361 descriptors as phenotypic traits, revealed a polygenic architecture controlling microbiota  
362 assembly, which is in line with the small percentage of variance explained by the phenotyping  
363 of individual mutant lines [87]. In agreement with those association genetic studies and the two  
364 GWAS conducted on *A. thaliana* in response to a PGPB strain [47, 49], we identified a complex  
365 genetic architecture for the response of *A. thaliana* to 13 non-pathogenic bacterial strains. In  
366 addition, this polygenic architecture was highly flexible among the 13 bacterial strains, with the  
367 detection of a few number of highly pleiotropic QTLs. Similar results were observed in recent  
368 GWAS conducted both in crops and wild species in response to experimental inoculation with  
369 individual pathogenic bacterial strains [88]. For instance, challenging 130 natural accessions of  
370 *A. thaliana* with 22 strains of the bacterial pathogen *Xanthomonas arboricola* revealed a clear



371 host-strain specificity in quantitative disease resistance [80]. The complex genetic interactions  
372 observed between *A. thaliana* and the main members of its leaf microbiota should maintain  
373 high levels of diversity at the candidate genes, which in turn should result in complex co-  
374 evolutionary dynamics [16].

375 Beyond the question of the effects of strong genotype-by-genotype (GxG) interactions on the  
376 nature and strength of footprints of natural selection on the genome of *A. thaliana*, whether the  
377 genetic architecture underlying the response of *A. thaliana* to co-inoculation corresponds to the  
378 sum of QTLs that are specific to the response to mono-inoculations and/or to the emergence of  
379 new QTLs, remains on an open question in the research area of plant-microbe interactions.  
380 Experimental studies on plant-plant interactions demonstrated that the genetic architecture of  
381 the response of *A. thaliana* in a plurispecific neighborhood was not predictable from the genetic  
382 architecture of the response of *A. thaliana* in the corresponding bispecific neighborhoods [56,  
383 57]

384

### 385 **Plant innate immunity is a significant source of natural genetic variation in plant-** 386 **microbiota interactions**

387 The candidate genes underlying the most pleiotropic QTLs have functions mainly related to  
388 plant development and/or stresses (biotic or abiotic stresses). Nevertheless, a more global  
389 approach identified four biological classes that were significantly and specifically over-  
390 represented for at least three bacterial strains but not with the mock, *i.e.* ‘cell’, ‘secondary  
391 metabolism’, ‘signalling’ and ‘transport’. These four classes were also over-represented in a  
392 GEAS performed on 163 natural populations of *A. thaliana* located south-west of France  
393 (including the 54 populations considered in this study) (Roux et al. 2022) and characterized *in*  
394 *situ* for bacterial communities in the leaf and root compartments using a metabarcoding

395 approach [38], thereby strengthening the importance of these four classes in mediating host  
396 response to the 13 bacterial strains tested here.

397 Strikingly, we found a clear enrichment for signalling genes underlying QTLs in response to  
398 the 13 bacterial strains tested in this study. Signalling genes have been extensively described as  
399 being involved in plant-microbe interactions. Of particular note, we identified 8 genes  
400 belonging to the CRK family, which represents one of the largest group of RLKs with 44  
401 members in *A. thaliana* [89, 90]. Some CRKs are involved in the regulation of plant  
402 developmental processes, while others are involved in stress and pathogen response [89].  
403 Interestingly, by assessing host transcriptional and metabolic adaptations to 39 bacterial strains  
404 in the leaf compartment of *A. thaliana*, a core set of 24 genes consistently induced by the  
405 presence of most strains was identified and thereby referred as a molecular process called  
406 general non-self-response (GNSR) [91]. Importantly, one gene of this core set (*CRK6*) was also  
407 identified as a candidate genes in our GWAs, reinforcing the importance of CRKs in plant-  
408 microbiota interactions.

409 Another interesting result is that while few classical *R* genes involved in specific recognition of  
410 microbial effectors have been identified in this study, we highlighted many candidate genes  
411 related to pattern-triggered immunity (PTI), including receptor-like kinases (RLKs) and  
412 receptor-like proteins (RLPs). PTI relies on the perception of specific molecular patterns such  
413 as microbe- or pathogen-associated molecular patterns (MAMPs/PAMPs), or self-molecules  
414 (damage-associated molecular patterns, DAMPs) [92]. In particular, we identified a main actor  
415 of PTI as a candidate gene, the *FLS2* gene in response to the two strains of OTU6 and one strain  
416 of OUT 13 (Supplementary Data Set 6), the best-characterized pattern-recognition receptor  
417 (PRR) gene, encoding an LRR-RLK protein that acts as a receptor for flg22 bacterial PAMP  
418 [92, 93]. Moreover, it was previously shown that CRK6 and CRK36 are part of the PRR FLS2  
419 protein complex, modulating PTI response through an association with FLS2 [94]. Two recent

420 works dissected the interplay between FLS2 and numerous flg22 variants, studying how *A.*  
421 *thaliana* association with different evolved flg22 variants from bacterial microbiota  
422 differentially fine-tune the balance between bacterial motility and defense activation [95, 96].  
423 PTI response is also characterized by the production of reactive oxygen species (ROS) and by  
424 the activation of the mitogen-activated protein kinases (MAPKs) cascade [97]. In our study, we  
425 identified four NADPH oxidase *RBOH* genes, among them *RBOHD* that is required for  
426 microbiota homeostasis in leaves [98]. Another candidate gene is *MPK4*, a main actor of PTI  
427 signalling (Bazin et al., 2020). Even if few mutant lines related to signalling and PTI have been  
428 tested for their effect on microbiota assembly [87, 98, 99], our results strengthen the need for a  
429 deeper investigation of some of our most promising candidate genes in relationship with the 13  
430 strains used in this study. Importantly, the *de-novo* whole-genome sequence of the 13 strains  
431 tested in this study have been recently obtained with long-read sequencing technology [53].  
432 Comparative genomics, and notably for their PAMP sequences (*i.e.* flagelline, EF-TU), may  
433 bring very informative data on their potential recognition by the plant, thereby making a link  
434 between plant-microbiota recognition and plant innate immunity. This is directly in line with a  
435 recent study that nicely shows how root commensal bacteria modulate host susceptibility to  
436 pathogens by either eliciting or dampening PTI responses [100].

437 **ACKNOWLEDGMENTS**

438 We are grateful to the members of the ECOGEN tem for their assistance during the sowing and  
439 thinning. D.R.S. was funded by a PhD fellowship from CONACYT. R.D. was funded by a grant  
440 from the French Ministry of National Education and Research. This project has received  
441 funding from the European Research Council (ERC) under the European Union’s Horizon 2020  
442 research and innovation programme (grant agreement No 951444 –PATHOCOM). This study  
443 was performed at the LIPME belonging to the Laboratoire d’Excellence (LABEX) entitled  
444 TULIP (ANR-10-LABX-41).

445

446 **CONFLICT OF INTEREST**

447 The authors declare no conflict of interest.

448

449 **DATA AVAILABILITY STATEMENT**

450 Raw phenotypic data are available in Supplementary Data Set 1.

451 **REFERENCES**

- 452 1. Stukenbrock EH, McDonald BA. The origins of plant pathogens in agro-ecosystems. *Annu*  
453 *Rev Phytopathol* 2008; **46**: 75–100.
- 454 2. Alexander HM. Disease in natural plant populations, communities, and ecosystems:  
455 Insights into ecological and evolutionary processes. *Plant Dis* 2010; **94**: 492–503.
- 456 3. Burdon JJ, Zhan J. Climate change and disease in plant communities. *PLoS Biol* 2020; **18**:  
457 e3000949.
- 458 4. Jeger MJ. The impact of climate change on disease in wild plant populations and  
459 communities. *Plant Pathol* 2022; **71**: 111–130.
- 460 5. Desaint H, Aoun N, Deslandes L, Vaillau F, Roux F, Berthomé R. Fight hard or die  
461 trying: when plants face pathogens under heat stress. *New Phytol* 2021; **229**: 712–734.
- 462 6. Jarosz AM, Davelos AL. Effects of disease in wild plant populations and the evolution of  
463 pathogen aggressiveness. *New Phytol* 1995; **129**: 371–387.
- 464 7. Burdon JJ. Fungal pathogens as selective forces in plant populations and communities.  
465 *Austral Ecol* 1991; **16**: 423–432.
- 466 8. Zhan J, Ericson L, González-Jiménez J, Burdon JJ. Disease influences host population  
467 growth rates in a natural wild plant–pathogen association over a 30-year period. *J Ecol*  
468 2022; **110**: 173–184.
- 469 9. Oerke E. Crop losses to pests. *J Agric Sci* 2006; **144**: 31–43.
- 470 10. Savary S, Willocquet L, Pethybridge SJ, Esker P, McRoberts N, Nelson A. The global  
471 burden of pathogens and pests on major food crops. *Nat Ecol Evol* 2019; **3**: 430–439.
- 472 11. McDonald BA, Stukenbrock EH. Rapid emergence of pathogens in agro-ecosystems:  
473 global threats to agricultural sustainability and food security. *Philos Trans R Soc Lond B*  
474 *Biol Sci* 2016; **371**.

- 475 12. Brown JKM. Yield penalties of disease resistance in crops. *Curr Opin Plant Biol* 2002; **5**:  
476 339–344.
- 477 13. Ristaino JB, Anderson PK, Bebber DP, Brauman KA, Cunniffe NJ, Fedoroff NV, et al.  
478 The persistent threat of emerging plant disease pandemics to global food security. *Proc*  
479 *Natl Acad Sci U S A* 2021; **118**: e2022239118.
- 480 14. Roux F, Bergelson J. The genetics underlying natural variation in the biotic interactions  
481 of *Arabidopsis thaliana*: the challenges of linking evolutionary genetics and community  
482 ecology. *Curr Top Dev Biol* 2016; **119**: 111–156.
- 483 15. Bartoli C, Roux F. Genome-Wide Association Studies in plant pathosystems: toward an  
484 ecological genomics approach. *Front Plant Sci* 2017; **8**: 763.
- 485 16. Karasov TL, Kniskern JM, Gao L, DeYoung BJ, Ding J, Dubiella U, et al. The long-term  
486 maintenance of a resistance polymorphism through diffuse interactions. *Nature* 2014; **512**:  
487 436–440.
- 488 17. Roux F, Voisin D, Badet T, Balagué C, Barlet X, Huard-Chauveau C, et al. Resistance to  
489 phytopathogens *e tutti quanti*: placing plant quantitative disease resistance on the map.  
490 *Mol Plant Pathol* 2014; **15**: 427–432.
- 491 18. Tack AJM, Laine A-L. Spatial eco-evolutionary feedback in plant-pathogen interactions.  
492 *Eur J Plant Pathol* 2014; **138**: 667–677.
- 493 19. Burdon JJ, Thrall PH, Ericson AL. The current and future dynamics of disease in plant  
494 communities. *Annu Rev Phytopathol* 2006; **44**: 19–39.
- 495 20. Li W, Deng Y, Ning Y, He Z, Wang G-L. Exploiting broad-spectrum disease resistance in  
496 crops: From molecular dissection to breeding. *Annu Rev Plant Biol* 2020; **71**: 575–603.
- 497 21. Deng Y, Ning Y, Yang D-L, Zhai K, Wang G-L, He Z. Molecular basis of disease  
498 resistance and perspectives on breeding strategies for resistance improvement in crops.  
499 *Mol Plant* 2020; **13**: 1402–1419.

- 500 22. Karasov TL, Shirsekar G, Schwab R, Weigel D. What natural variation can teach us about  
501 resistance durability. *Curr Opin Plant Biol* 2020; **56**: 89–98.
- 502 23. Bergelson J, Roux F. Towards identifying genes underlying ecologically relevant traits in  
503 *Arabidopsis thaliana*. *Nat Rev Genet* 2010; **11**: 867–879.
- 504 24. Monnot S, Desaint H, Mary-Huard T, Moreau L, Schurdi-Levraud V, Boissot N.  
505 Deciphering the genetic architecture of plant virus resistance by GWAS, state of the art  
506 and potential advances. *Cells* 2021; **10**: 3080.
- 507 25. Atwell S, Huang YS, Vilhjálmsson BJ, Willems G, Horton M, Li Y, et al. Genome-wide  
508 association study of 107 phenotypes in *Arabidopsis thaliana* inbred lines. *Nature* 2010;  
509 **465**: 627–631.
- 510 26. Xiao Y, Liu H, Wu L, Warburton M, Yan J. Genome-wide association studies in maize:  
511 Praise and stargaze. *Mol Plant* 2017; **10**: 359–374.
- 512 27. Gupta PK, Kulwal PL, Jaiswal V. Association mapping in plants in the post-GWAS  
513 genomics era. *Adv Genet* 2019; **104**: 75–154.
- 514 28. Aoun N, Desaint H, Boyrie L, Bonhomme M, Deslandes L, Berthomé R, et al. A complex  
515 network of additive and epistatic quantitative trait loci underlies natural variation of  
516 *Arabidopsis thaliana* quantitative disease resistance to *Ralstonia solanacearum* under heat  
517 stress. *Mol Plant Pathol* 2020; **21**: 1405–1420.
- 518 29. Aoun N, Tauleigne L, Lonjon F, Deslandes L, Vaillau F, Roux F, et al. Quantitative  
519 disease resistance under elevated temperature: genetic basis of new resistance mechanisms  
520 to *Ralstonia solanacearum*. *Front Plant Sci* 2017; **8**: 1387.
- 521 30. Demirjian C, Razavi N, Desaint H, Lonjon F, Genin S, Roux F, et al. Study of natural  
522 diversity in response to a key pathogenicity regulator of *Ralstonia solanacearum* reveals  
523 new susceptibility genes in *Arabidopsis thaliana*. *Mol Plant Pathol* 2022; **23**: 321–338.

- 524 31. Debieu M, Huard-Chauveau C, Genissel A, Roux F, Roby D. Quantitative disease  
525 resistance to the bacterial pathogen *Xanthomonas campestris* involves an Arabidopsis  
526 immune receptor pair and a gene of unknown function. *Mol Plant Pathol* 2016; **17**: 510–  
527 520.
- 528 32. Badet T, Voisin D, Mbengue M, Barascud M, Sucher J, Sadon P, et al. Parallel evolution  
529 of the POQR prolyl oligo peptidase gene conferring plant quantitative disease resistance.  
530 *PLoS Genet* 2017; **13**: e1007143.
- 531 33. Huard-Chauveau C, Perchepied L, Debieu M, Rivas S, Kroj T, Kars I, et al. An atypical  
532 kinase under balancing selection confers broad-spectrum disease resistance in  
533 Arabidopsis. *PLoS Genet* 2013; **9**: e1003766.
- 534 34. Delplace F, Huard-Chauveau C, Dubiella U, Khafif M, Alvarez E, Langin G, et al.  
535 Robustness of plant quantitative disease resistance is provided by a decentralized immune  
536 network. *Proc Natl Acad Sci U S A* 2020; **117**: 18099–18109.
- 537 35. Delplace F, Huard-Chauveau C, Berthomé R, Roby D. Network organization of the plant  
538 immune system: from pathogen perception to robust defense induction. *Plant J* 2021.
- 539 36. Müller DB, Vogel C, Bai Y, Vorholt JA. The plant microbiota: systems-level insights and  
540 perspectives. *Annual Review of Genetics* . 2016. , **50**: 211–234
- 541 37. Berendsen RL, Pieterse CMJ, Bakker PAHM. The rhizosphere microbiome and plant  
542 health. *Trends Plant Sci* 2012; **17**: 478–486.
- 543 38. Bartoli C, Frachon L, Barret M, Rigal M, Huard-Chauveau C, Mayjonade B, et al. In situ  
544 relationships between microbiota and potential pathobiota in *Arabidopsis thaliana*. *ISME*  
545 *J* 2018; **12**: 2024–2038.
- 546 39. Bulgarelli D, Schlaeppi K, Spaepen S, Ver Loren van Themaat E, Schulze-Lefert P.  
547 Structure and functions of the bacterial microbiota of plants. *Annu Rev Plant Biol* 2013;  
548 **64**: 807–838.



- 549 40. Pieterse CMJ, Zamioudis C, Berendsen RL, Weller DM, Van Wees SCM, Bakker PAHM.  
550 Induced systemic resistance by beneficial microbes. *Annu Rev Phytopathol* 2014; **52**: 347–  
551 375.
- 552 41. Escudero-Martinez C, Bulgarelli D. Tracing the evolutionary routes of plant-microbiota  
553 interactions. *Curr Opin Microbiol* 2019; **49**: 34–40.
- 554 42. Trivedi P, Leach JE, Tringe SG, Sa T, Singh BK. Plant-microbiome interactions: from  
555 community assembly to plant health. *Nat Rev Microbiol* 2020; **18**: 607–621.
- 556 43. Glick BR, Gamalero E. Recent developments in the study of plant microbiomes.  
557 *Microorganisms* 2021; **9**: 1533.
- 558 44. Bai B, Liu W, Qiu X, Zhang J, Zhang J, Bai Y. The root microbiome: Community  
559 assembly and its contributions to plant fitness. *J Integr Plant Biol* 2022; **64**: 230–243.
- 560 45. Kroll S, Agler MT, Kemen E. Genomic dissection of host–microbe and microbe–microbe  
561 interactions for advanced plant breeding. *Curr Opin Plant Biol* 2017; **36**: 71–78.
- 562 46. Naitam M, Kaushik R, Sharma A. Crop microbiome engineering and relevance in abiotic  
563 stress tolerance. *Soil Biology*. 2021. Springer International Publishing, Cham, pp 253–277.
- 564 47. Wintermans PCA, Bakker PAHM, Pieterse CMJ. Natural genetic variation in *Arabidopsis*  
565 for responsiveness to plant growth-promoting rhizobacteria. *Plant Mol Biol* 2016; **90**:  
566 623–634.
- 567 48. Vidotti MS, Lyra DH, Morosini JS, Granato ÍSC, Quecine MC, Azevedo JL de, et al.  
568 Additive and heterozygous (dis)advantage GWAS models reveal candidate genes involved  
569 in the genotypic variation of maize hybrids to *Azospirillum brasilense*. *PLoS One* 2019;  
570 **14**: e0222788.
- 571 49. Cotta MS, do Amaral FP, Cruz LM, Wassem R, de Oliveira Pedrosa F, Yokoyama T, et  
572 al. Genome-Wide Association Studies reveal important candidate genes for the *Bacillus*  
573 *pumilus* TUAT-1-*Arabidopsis thaliana* interaction. *bioRxiv* . 2020. bioRxiv.

- 574 50. Stanton-Geddes J, Paape T, Epstein B, Briskine R, Yoder J, Mudge J, et al. Candidate  
575 genes and genetic architecture of symbiotic and agronomic traits revealed by whole-  
576 genome, sequence-based association genetics in *Medicago truncatula*. *PLoS One* 2013; **8**:  
577 e65688.
- 578 51. Torkamaneh D, Chalifour F-P, Beauchamp CJ, Agrama H, Boahen S, Maaroufi H, et al.  
579 Genome-wide association analyses reveal the genetic basis of biomass accumulation under  
580 symbiotic nitrogen fixation in African soybean. *Züchter Genet Breed Res* 2020; **133**: 665–  
581 676.
- 582 52. Curtin SJ, Tiffin P, Guhlin J, Trujillo DI, Burghart LT, Atkins P, et al. Validating genome-  
583 wide association candidates controlling quantitative variation in nodulation. *Plant Physiol*  
584 2017; **173**: 921–931.
- 585 53. Ramirez-Sanchez D, Gibelin-Viala C, Mayjonade B, Duflos R, Belmonte E, Pailler V, et  
586 al. Investigating genetic diversity within the most abundant and prevalent non-pathogenic  
587 leaf-associated bacteria interacting with *Arabidopsis thaliana* in natural habitats. *bioRxiv*  
588 . 2022.
- 589 54. Gautier M. Genome-Wide Scan for adaptive divergence and association with population-  
590 specific covariates. *Genetics* 2015; **201**: 1555–1579.
- 591 55. Bonhomme M, Fariello MI, Navier H, Hajri A, Badis Y, Miteul H, et al. A local score  
592 approach improves GWAS resolution and detects minor QTL: application to *Medicago*  
593 *truncatula* quantitative disease resistance to multiple *Aphanomyces euteiches* isolates.  
594 *Heredity* 2019; **123**: 517–531.
- 595 56. Libourel C, Baron E, Lenglet J, Amsellem L, Roby D, Roux F. The genomic architecture  
596 of competitive response of *Arabidopsis thaliana* is highly flexible among plurispecific  
597 neighborhoods. *Front Plant Sci* 2021; **12**: 741122.

- 598 57. Frachon L, Mayjonade B, Bartoli C, Hautekèete N-C, Roux F. Adaptation to plant  
599 communities across the genome of *Arabidopsis thaliana*. *Mol Biol Evol* 2019; **36**: 1442–  
600 1456.
- 601 58. Frachon L, Bartoli C, Carrère S, Bouchez O, Chaubet A, Gautier M, et al. A genomic map  
602 of climate adaptation in *Arabidopsis thaliana* at a micro-geographic scale. *Front Plant Sci*  
603 2018; **9**: 967.
- 604 59. Roux F, Mary-Huard T, Barillot E, Wenes E, Botran L, Durand S, et al. Cytonuclear  
605 interactions affect adaptive traits of the annual plant *Arabidopsis thaliana* in the field. *Proc*  
606 *Natl Acad Sci U S A* 2016; **113**: 3687–3692.
- 607 60. Watanabe E, Mano S, Nishimura M, Yamada K. *AtUBL5* regulates growth and  
608 development through pre-mRNA splicing in *Arabidopsis thaliana*. *PLoS One* 2019; **14**:  
609 e0224795.
- 610 61. Srivastava AK, Dutta S, Chattopadhyay S. MYC2 regulates ARR16, a component of  
611 cytokinin signaling pathways, in *Arabidopsis* seedling development. *Plant Direct* 2019; **3**:  
612 e00177.
- 613 62. Yang W, Choi M-H, Noh B, Noh Y-S. De Novo shoot regeneration controlled by HEN1  
614 and TCP3/4 in *Arabidopsis*. *Plant Cell Physiol* 2020; **61**: 1600–1613.
- 615 63. Zhang Y, Fan S, Hua C, Teo ZWN, Kiang JX, Shen L, et al. Phase separation of HRLP  
616 regulates flowering time in *Arabidopsis*. *Sci Adv* 2022; **8**: eabn5488.
- 617 64. Guo X, Li L, Liu X, Zhang C, Yao X, Xun Z, et al. MYB2 is important for tapetal PCD  
618 and pollen development by directly activating protease expression in *Arabidopsis*. *Int J*  
619 *Mol Sci* 2022; **23**: 3563.
- 620 65. Jia T, Zhang K, Li F, Huang Y, Fan M, Huang T. The AtMYB2 inhibits the formation of  
621 axillary meristem in *Arabidopsis* by repressing RAX1 gene under environmental stresses.  
622 *Plant Cell Rep* 2020; **39**: 1755–1765.

- 623 66. Nguyen HTK, Hyoung S, Kim HJ, Cho KM, Shin JS. The transcription factor  $\gamma$ MYB2 acts  
624 as a negative regulator of secondary cell wall thickening in anther and stem. *Gene* 2019;  
625 **702**: 158–165.
- 626 67. White DWR. PEAPOD repressors modulate and coordinate developmental responses to  
627 light intensity in Arabidopsis. *New Phytol* 2022; **235**: 1470–1485.
- 628 68. González R, Butković A, Rivarez MPS, Elena SF. Natural variation in *Arabidopsis*  
629 *thaliana* rosette area unveils new genes involved in plant development. *Sci Rep* 2020; **10**:  
630 17600.
- 631 69. White DWR. PEAPOD regulates lamina size and curvature in Arabidopsis. *Proc Natl*  
632 *Acad Sci U S A* 2006; **103**: 13238–13243.
- 633 70. Zhu Y, Luo X, Liu X, Wu W, Cui X, He Y, et al. Arabidopsis PEAPODs function with  
634 LIKE HETEROCHROMATIN PROTEIN1 to regulate lateral organ growth. *J Integr Plant*  
635 *Biol* 2020; **62**: 812–831.
- 636 71. Friedman EJ, Wang HX, Jiang K, Perovic I, Deshpande A, Pochapsky TC, et al.  
637 Acireductone dioxygenase 1 (ARD1) is an effector of the heterotrimeric G protein beta  
638 subunit in Arabidopsis. *J Biol Chem* 2011; **286**: 30107–30118.
- 639 72. Baekelandt A, Pauwels L, Wang Z, Li N, De Milde L, Natran A, et al. Arabidopsis leaf  
640 flatness is regulated by PPD2 and NINJA through repression of CYCLIN D3 genes. *Plant*  
641 *Physiol* 2018; **178**: 217–232.
- 642 73. Franciosini A, Lombardi B, Iafrate S, Pecce V, Mele G, Lupacchini L, et al. The  
643 Arabidopsis COP9 SIGNALOSOME INTERACTING F-BOX KELCH 1 protein forms  
644 an SCF ubiquitin ligase and regulates hypocotyl elongation. *Mol Plant* 2013; **6**: 1616–  
645 1629.

- 646 74. Chung KP, Zeng Y, Li Y, Ji C, Xia Y, Jiang L. Signal motifs-dependent ER export of Qc-  
647 SNARE BET12 interacts with MEMB12 and affects PR1 trafficking in Arabidopsis. *J Cell*  
648 *Sci* 2017; **131**: jcs202838.
- 649 75. Li B, Wang R, Wang S, Zhang J, Chang L. Diversified regulation of cytokinin levels and  
650 signaling during Botrytis cinerea infection in Arabidopsis. *Front Plant Sci* 2021; **12**:  
651 584042.
- 652 76. Chung HY, Sunter G. Interaction between the transcription factor AtTIFY4B and  
653 begomovirus AL2 protein impacts pathogenicity. *Plant Mol Biol* 2014; **86**: 185–200.
- 654 77. Zaidem ML, Groen SC, Purugganan MD. Evolutionary and ecological functional  
655 genomics, from lab to the wild. *Plant J* 2019; **97**: 40–55.
- 656 78. Brachi B, Faure N, Horton M, Flahauw E, Vazquez A, Nordborg M, et al. Linkage and  
657 association mapping of *Arabidopsis thaliana* flowering time in nature. *PLoS Genet* 2010;  
658 **6**: e1000940.
- 659 79. Pujol B, Blanchet S, Charmantier A, Danchin E, Facon B, Marrot P, et al. The Missing  
660 Response to Selection in the Wild. *Trends Ecol Evol* 2018; **33**: 337–346.
- 661 80. Wang M, Roux F, Bartoli C, Huard-Chauveau C, Meyer C, Lee H, et al. Two-way mixed-  
662 effects methods for joint association analysis using both host and pathogen genomes. *Proc*  
663 *Natl Acad Sci U S A* 2018; **115**: E5440–E5449.
- 664 81. Mantelin S, Touraine B. Plant growth-promoting bacteria and nitrate availability: impacts  
665 on root development and nitrate uptake. *J Exp Bot* 2004; **55**: 27–34.
- 666 82. Brock AK, Berger B, Mewis I, Ruppel S. Impact of the PGPB *Enterobacter radicincitans*  
667 DSM 16656 on growth, glucosinolate profile, and immune responses of *Arabidopsis*  
668 *thaliana*. *Microb Ecol* 2013; **65**: 661–670.

- 669 83. Horton MW, Bodenhausen N, Beilsmith K, Meng D, Muegge BD, Subramanian S, et al.  
670 Genome-wide association study of *Arabidopsis thaliana* leaf microbial community. *Nat*  
671 *Commun* 2014; **5**: 5320.
- 672 84. Brachi B, Filiault D, Whitehurst H, Darme P, Le Gars P, Le Mentec M, et al. Plant genetic  
673 effects on microbial hubs impact host fitness in repeated field trials. *Proc Natl Acad Sci U*  
674 *S A* 2022; **119**: e2201285119.
- 675 85. Walters WA, Jin Z, Youngblut N, Wallace JG, Sutter J, Zhang W, et al. Large-scale  
676 replicated field study of maize rhizosphere identifies heritable microbes. *Proc Natl Acad*  
677 *Sci U S A* 2018; **115**: 7368–7373.
- 678 86. Roman-Reyna V, Pinili D, Borja FN, Quibod IL, Groen SC, Alexandrov N, et al.  
679 Characterization of the leaf microbiome from whole-genome sequencing data of the 3000  
680 rice genomes project. *Rice* 2020; **13**: 72.
- 681 87. Bergelson J, Brachi B, Roux F, Vaillau F. Assessing the potential to harness the  
682 microbiome through plant genetics. *Curr Opin Biotechnol* 2021; **70**: 167–173.
- 683 88. Zhang F, Hu Z, Wu Z, Lu J, Shi Y, Xu J, et al. Reciprocal adaptation of rice and  
684 *Xanthomonas oryzae* pv. *oryzae*: cross-species 2D GWAS reveals the underlying genetics.  
685 *Plant Cell* 2021; **33**: 2538–2561.
- 686 89. Bourdais G, Burdiak P, Gauthier A, Nitsch L, Salojärvi J, Rayapuram C, et al. Large-scale  
687 phenomics identifies primary and fine-tuning roles for CRKs in responses related to  
688 oxidative stress. *PLoS Genet* 2015; **11**: e1005373.
- 689 90. Wrzaczek M, Brosché M, Salojärvi J, Kangasjärvi S, Idänheimo N, Mersmann S, et al.  
690 Transcriptional regulation of the CRK/DUF26 group of receptor-like protein kinases by  
691 ozone and plant hormones in *Arabidopsis*. *BMC Plant Biol* 2010; **10**: 95.
- 692 91. Maier BA, Kiefer P, Field CM, Hemmerle L, Bortfeld-Miller M, Emmenegger B, et al. A  
693 general non-self response as part of plant immunity. *Nat Plants* 2021; **7**: 696–705.

- 694 92. Macho AP, Zipfel C. Plant PRRs and the activation of innate immune signaling. *Mol Cell*  
695 2014; **54**: 263–272.
- 696 93. Gómez-Gómez L, Boller T. FLS2: an LRR receptor-like kinase involved in the perception  
697 of the bacterial elicitor flagellin in Arabidopsis. *Mol Cell* 2000; **5**: 1003–1011.
- 698 94. Yeh Y-H, Chang Y-H, Huang P-Y, Huang J-B, Zimmerli L. Enhanced Arabidopsis  
699 pattern-triggered immunity by overexpression of cysteine-rich receptor-like kinases. *Front*  
700 *Plant Sci* 2015; **6**: 322.
- 701 95. Colaianni NR, Parys K, Lee H-S, Conway JM, Kim NH, Edelbacher N, et al. A complex  
702 immune response to flagellin epitope variation in commensal communities. *Cell Host*  
703 *Microbe* 2021; **29**: 635-649.e9.
- 704 96. Parys K, Colaianni NR, Lee H-S, Hohmann U, Edelbacher N, Trgovcevic A, et al.  
705 Signatures of antagonistic pleiotropy in a bacterial flagellin epitope. *Cell Host Microbe* .  
706 2021. Elsevier BV. , **29**: 620-634.e9
- 707 97. Monaghan J, Zipfel C. Plant pattern recognition receptor complexes at the plasma  
708 membrane. *Curr Opin Plant Biol* 2012; **15**: 349–357.
- 709 98. Pfeilmeier S, Petti GC, Bortfeld-Miller M, Daniel B, Field CM, Sunagawa S, et al. The  
710 plant NADPH oxidase RBOHD is required for microbiota homeostasis in leaves. *Nat*  
711 *Microbiol* 2021; **6**: 852–864.
- 712 99. Chen T, Nomura K, Wang X, Sohrabi R, Xu J, Yao L, et al. A plant genetic network for  
713 preventing dysbiosis in the phyllosphere. *Nature* 2020; **580**: 653–657.
- 714 100. Ma K-W, Niu Y, Jia Y, Ordon J, Copeland C, Emonet A, et al. Coordination of microbe-  
715 host homeostasis by crosstalk with plant innate immunity. *Nat Plants* 2021; **7**: 814–825.  
716
- 717 Roux F, Frachon L, Bartoli C. The genetic architecture of adaptation to leaf and root bacterial  
718 communities in *Arabidopsis thaliana*. In preparation 2022.

719 **FIGURE LEGENDS**

720 **Figure 1.** Phenotypic variation of the response to the mock treatment and the 13 bacterial strains  
721 in field conditions. **a** Box-plots illustrating the variation among the 14 treatments for the trait  
722 ‘area-9dai’. **b** Box-plots illustrating the variation among the 14 treatments for the trait ‘RGR-  
723 5dai-1dbi’. For each treatment, each dot corresponds to the genotypic value of one of the 54  
724 populations of *A. thaliana*. For each trait, different letters indicate different groups according  
725 to the treatments after a Ryan-Einot-Gabriel-Welsh (REGWQ) multiple-range test at  $P = 0.05$ .  
726 dai: days after inoculation, dbi: day before inoculation.

727

728 **Figure 2.** Genetic variation of 54 natural populations of *A. thaliana* in response to the 13  
729 bacterial strains in field conditions. **a** Box-plots illustrating the range of genetic correlations  
730 between each treatment with a bacterial strain and the remaining 13 treatments for the traits  
731 ‘area-5dai’ and ‘area-9dai’. **b** Box-plots illustrating the range of genetic correlations between  
732 each treatment with a bacterial strain and the remaining 13 treatments for the traits ‘RGR-5dai-  
733 1dbi’ and ‘RGR-9dai-1dbi’. Red triangle: genetic correlation with the mock treatment, black  
734 dots: genetic correlations with other treatments with a bacterial strain (*ggplot2* library  
735 implemented in the R environment). dai: days after inoculation, dbi: day before inoculation.  
736 Treatments are ranked according to their mean genetic correlation with other treatments.

737

738 **Figure 3.** Interaction plots illustrating the reaction norms observed at the population level  
739 between the mock treatment and the treatment with OTU13\_Msp\_1 (left panel) and  
740 OTU13\_Msp\_2 (right panel). Each dot corresponds to the genotypic value of one of the 54  
741 populations of *A. thaliana*. Each line corresponds to the response of one of the 54 populations  
742 to the inoculation with either OTU13\_Msp strain. The blue and red lines correspond to two  
743 populations FERR-A and LUZE-B, respectively, with an opposite response to the strain



744 OTU13\_Msp\_2. Pictures illustrate representative plants of the two populations highlighted in  
745 blue and red for the mock treatment and the treatment with either OTU13\_Msp strain.

746

747 **Figure 4.** Genetic architecture of the response of 54 natural populations of *A. thaliana* to the 13  
748 bacterial strains in field conditions. **a** Number of QTLs per treatment for each of the nine  
749 phenotypic traits. **b** An UpSet plot illustrating the flexibility of genetic architecture among the  
750 13 treatments with bacterial strains for the trait ‘area-9dai’ (*upset* library implemented in the *R*  
751 environment). ‘Number of genes’: Total number of candidate genes underlying detected QTLs  
752 and not shared with the mock treatment. A single dot indicates the number of candidate genes  
753 specific to a given treatment. Candidate genes shared between two or more treatments are  
754 represented by a line connecting two or more dots.

755

756 **Figure 5.** Manhattan plots of the Lindley process for the trait ‘area\_9dai’ for the mock treatment  
757 and the treatments with the bacterial strains OTU13\_Msp\_2, OTU5\_Pmo\_1 and OTU5\_Pmo\_2.  
758 The *x*-axis corresponds to the physical position of 1,638,649 SNPs on the five chromosomes.  
759 The dashed lines indicate the minimum and maximum of the five chromosome-wide significance  
760 thresholds.

761

762 **Figure 6.** Enriched biological processes in response to the 13 bacterial strains in field  
763 conditions. **a** Enriched biological processes for the list of unique candidate genes for each of  
764 the 14 treatments and for the list of unique candidate genes from the combined 13 bacterial  
765 strains (‘All strains’), obtained with the MapMan classification supervisor tool. The color of  
766 the dots corresponds to the level of significance. **b** Number of candidate genes belonging to the  
767 different sub-categories of the enriched ‘signalling’ biological process for each treatment with

768 a bacterial strain. LRR: leucine rich repeat, CRK: cystein-rich receptor-like kinase, MAP:  
769 mitogen-activated protein.

770 **SUPPLEMENTARY FIGURES AND TABLES**

771 **Supplementary Figure S1.** Experimental design of the field experiment.

772 **Supplementary Figure S2.** Phenotyping of three traits related to vegetative growth by imaging  
773 (AREA, PERIMETER and DIAMETER).

774 **Supplementary Figure S3.** Phenotypic variation of the response to the 13 bacterial strains in  
775 field conditions.

776 **Supplementary Figure S4.** Box-plots illustrating the range of genetic correlations between  
777 each treatment with a bacterial strain and the remaining 13 treatments for the traits ‘perimeter-  
778 5dai’, ‘perimeter-9dai’, ‘diameter-5dai’, ‘diameter-9dai’ and ‘RGR-9dai-5dai’.

779 **Supplementary Figure S5.** UpSet plots illustrating the flexibility of genetic architecture  
780 among the 13 treatments with bacteria strains for the traits ‘area-5dai’, ‘perimeter-5dai’,  
781 ‘perimeter-9dai’, ‘diameter-5dai’, ‘diameter-9dai’, ‘RGR-5dai-1dbi’, ‘RGR-9dai-5dai’ and  
782 ‘RGR-9dai-1dai’.

783 **Supplementary Table S1.** Names and GPS coordinates (expressed in degrees) of the 54  
784 populations used in this study.

785 **Supplementary Table S2.** Homogeneity of plant growth across the field trial and presence of  
786 genetic variation for the three resource acquisition traits measured on the plants before  
787 inoculation.

788 **Supplementary Table S3.** Genetic variation of nine traits related to resource acquisition among  
789 the 162 accessions nested within 54 populations of *A. thaliana* for each of the 14 treatments.

790 **SUPPLEMENTARY DATA SETS**

791 **Supplementary Data Set 1.** Raw data for the 12 phenotypic traits scored on 14,580 plants in a  
792 field experiment conducted at INRAE Toulouse (France).

793 **Supplementary Data Set 2.** Genotypic values of the 54 natural populations of *A. thaliana* for  
794 the nine traits ‘area-5dai’, ‘area-9dai’, ‘perimeter-5dai’, ‘perimeter-9dai’, ‘diameter-5dai’,  
795 ‘diameter-9dai’, ‘RGR-5dai-1dbi’, ‘RGR-9dai-5dai’ and ‘RGR-9dai-1dai’ for each of the 14  
796 treatments.

797 **Supplementary Data Set 3.** Genetic architecture of the 126 ‘phenotypic trait \* treatment’  
798 combinations.

799 **Supplementary Data Set 4.** List of all candidate genes identified for each of the 126  
800 ‘phenotypic trait \* treatment’ combinations.

801 **Supplementary Data Set 5.** List of unique candidate genes identified for each trait of each  
802 treatment with a bacterial strain.

803 **Supplementary Data Set 6.** List of the 1,962 candidate genes unique to the treatments with a  
804 bacterial strain. The pleiotropic level corresponds to the number of treatments with a bacterial  
805 strain for which the candidate gene was detected by GWA mapping.

**Table 1.** List of pleiotropic candidate genes associated with more than six bacterial strains but not detected in the mock treatment. Colored squares indicate the strains for which the candidate genes were identified. The different colors correspond to the seven QTLs in which the pleiotropic QTLs are located.

| ATG number | Annotation                                                              | OTU2_Pfu_1 | OTU2_Pfu_2 | OTU3a_Oxa_1 | OTU3a_Oxa_2 | OTU4_Com_1 | OTU5_Pmo_1 | OTU5_Pmo_2 | OTU6_Psi_1 | OTU6_Psi_2 | OTU13_Msp_1 | OTU13_Msp_2 | OTU29_Sph_1 | OTU29_Sph_2 |
|------------|-------------------------------------------------------------------------|------------|------------|-------------|-------------|------------|------------|------------|------------|------------|-------------|-------------|-------------|-------------|
| At2g40640  | PUB62 (Plant U-box type E3 ubiquitin ligase)                            | ■          | ■          |             |             |            |            | ■          |            | ■          | ■           | ■           | ■           | ■           |
| At2g40650  | PRP38                                                                   | ■          | ■          |             |             |            |            | ■          |            | ■          | ■           | ■           | ■           | ■           |
| At2g40660  | Nucleic acid-binding, OB-fold-like protein                              | ■          | ■          |             |             |            |            | ■          |            | ■          | ■           | ■           | ■           | ■           |
| At2g40670  | ARR16 (ARABIDOPSIS THALIANA RESPONSE REGULATOR 16)                      | ■          | ■          |             |             |            |            | ■          |            | ■          | ■           | ■           | ■           | ■           |
| At2g44710  | HNRNP R-LIKE PROTEIN, HRLP                                              |            | ■          | ■           | ■           |            |            | ■          | ■          | ■          | ■           |             | ■           |             |
| At2g44730  | Alcohol dehydrogenase transcription factor Myb/SANT-like family protein |            | ■          | ■           | ■           |            |            | ■          | ■          | ■          | ■           |             | ■           |             |
| At2g44735  | transmembrane protein                                                   |            | ■          | ■           | ■           |            |            | ■          | ■          | ■          | ■           |             | ■           |             |
| At2g47180  | ATGOLS1, GALACTINOL SYNTHASE 1                                          | ■          | ■          | ■           |             |            |            | ■          | ■          |            |             |             | ■           | ■           |
| At2g47190  | ATMYB2, MYB DOMAIN PROTEIN 2                                            | ■          | ■          | ■           |             |            |            | ■          | ■          |            |             |             | ■           | ■           |
| At2g47250  | RNA helicase family protein                                             | ■          |            | ■           | ■           |            | ■          | ■          | ■          |            | ■           | ■           |             |             |
| At4g14713  | PEAPOD 1, PPD1, TIFY4A                                                  | ■          |            |             |             | ■          | ■          |            | ■          | ■          |             | ■           | ■           | ■           |
| At4g14716  | ACIREDUCTONE DIOXYGENASE 1, ARD1, ATARD1, SGB3, SUPPRESSOR OF G BETA 3  | ■          |            |             |             | ■          | ■          |            | ■          | ■          |             | ■           | ■           | ■           |
| At4g14720  | PEAPOD 2, PPD2, TIFY4B                                                  | ■          |            |             |             | ■          | ■          |            | ■          | ■          |             | ■           | ■           | ■           |
| At5g42360  | CFK2, COP9 SIGNALOSOME INTERACTING F-BOX KELCH 2                        | ■          | ■          |             | ■           | ■          |            |            | ■          |            |             |             | ■           | ■           |
| At5g42370  | Calcineurin-like metallo-phosphoesterase superfamily protein            | ■          | ■          |             | ■           | ■          |            |            | ■          |            |             |             | ■           | ■           |
| At5g50440  | ATMEMB12, MEMB12, MEMBRIN 12                                            |            | ■          | ■           | ■           | ■          |            |            | ■          | ■          | ■           |             |             | ■           |
| At5g50450  | HCP-like superfamily protein with MYND-type zinc finger                 |            | ■          | ■           | ■           | ■          |            |            | ■          | ■          | ■           |             |             | ■           |

**Figure 1**

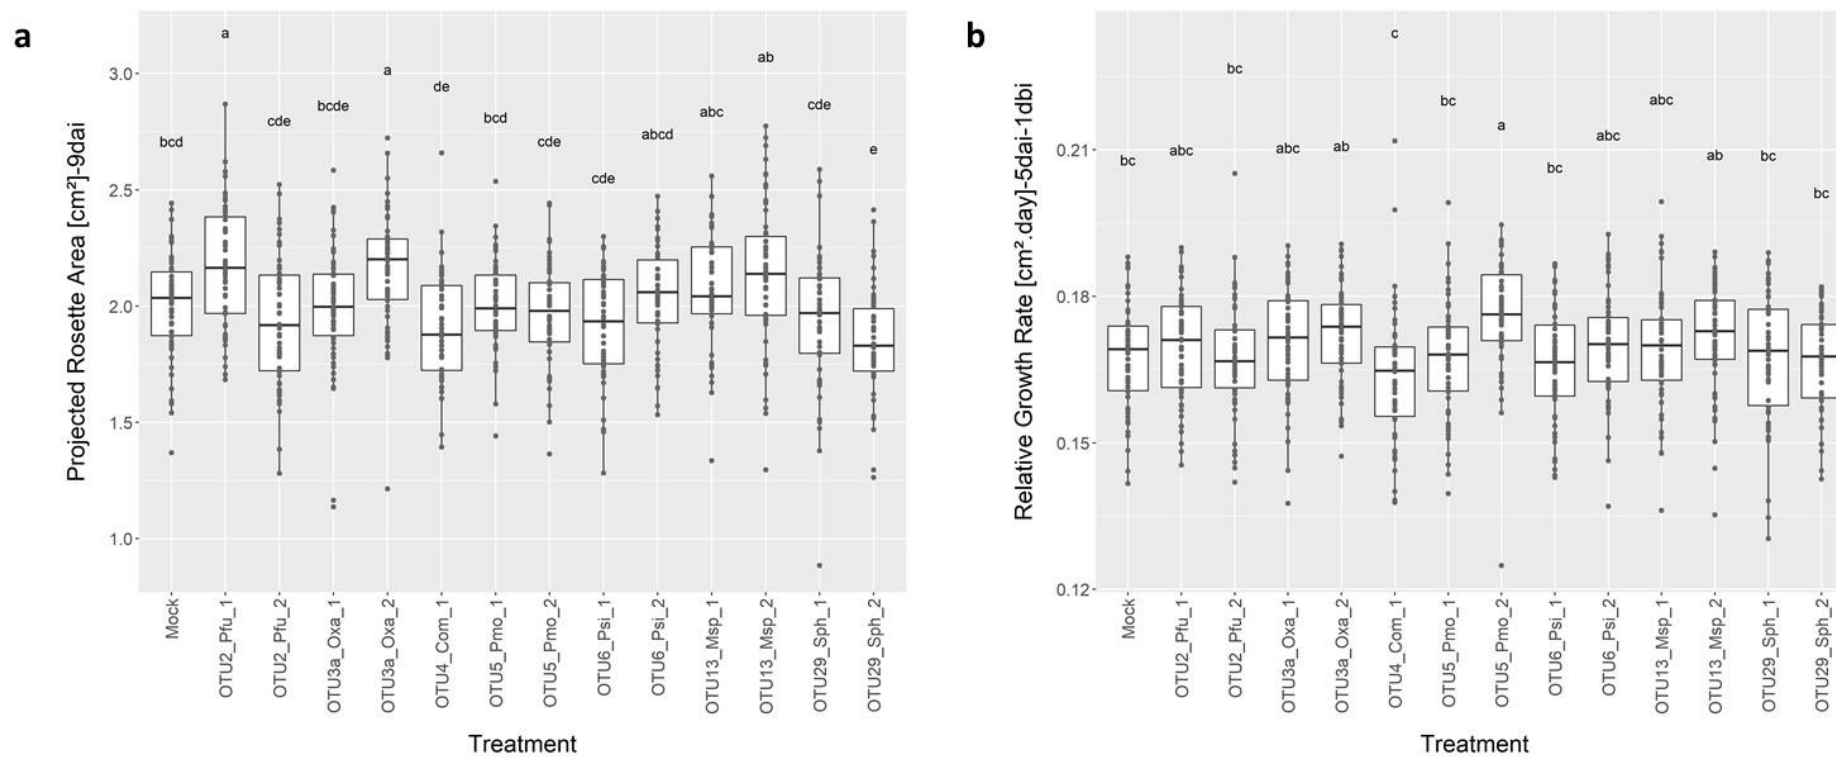

**Figure 2**

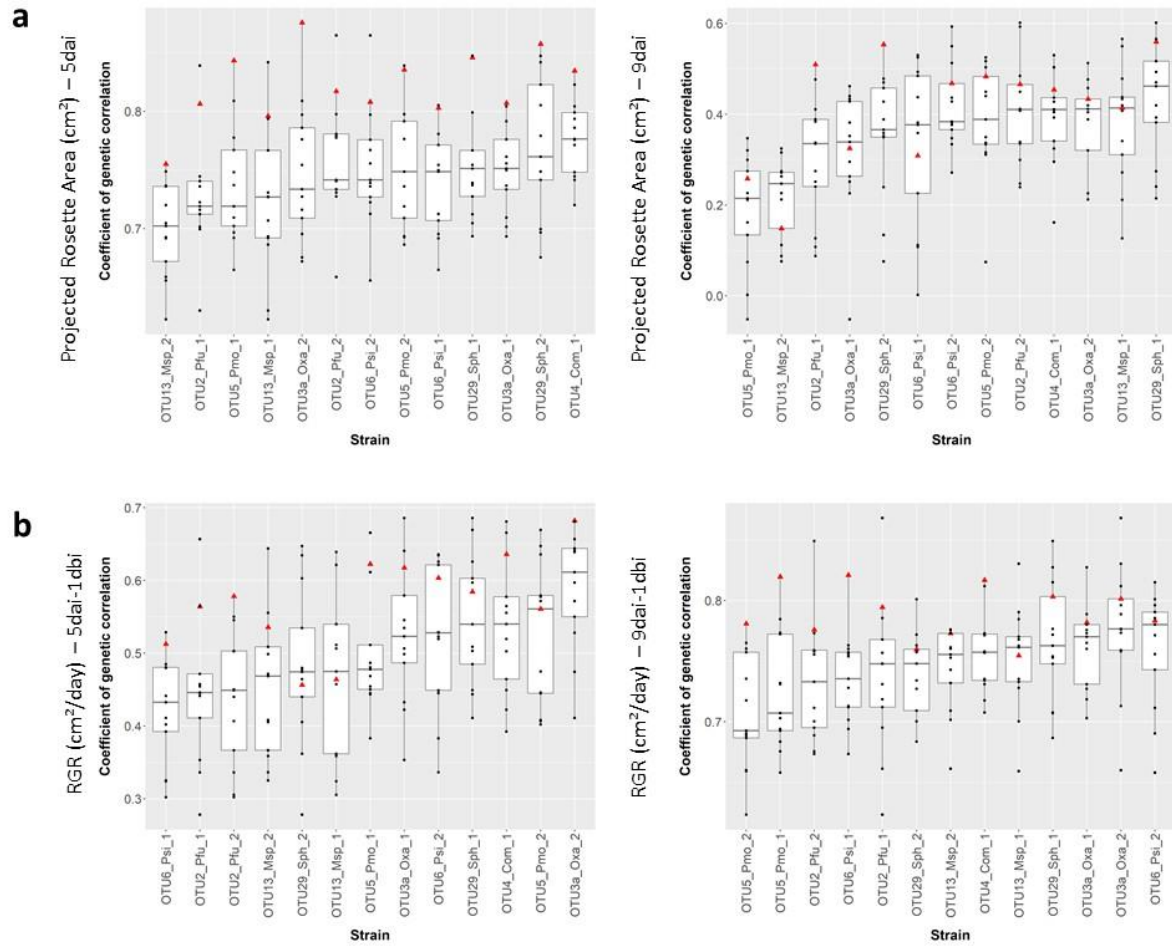

**Figure 3**

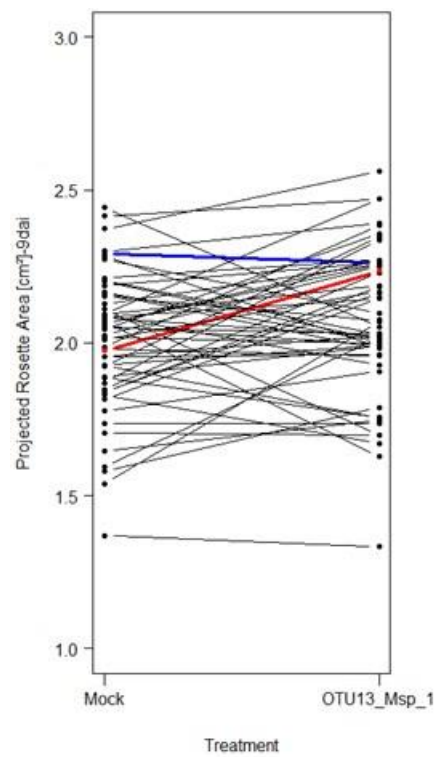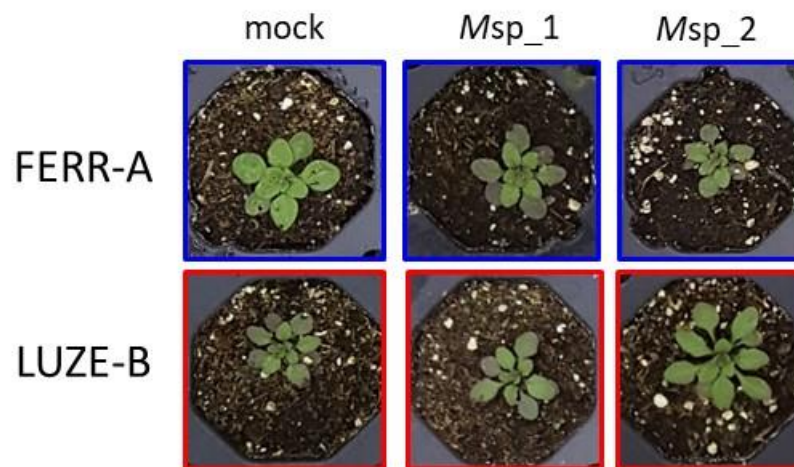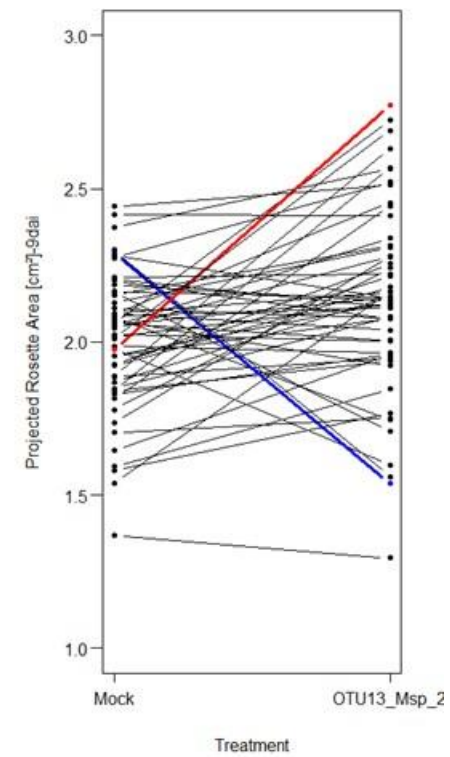



**Figure 4**

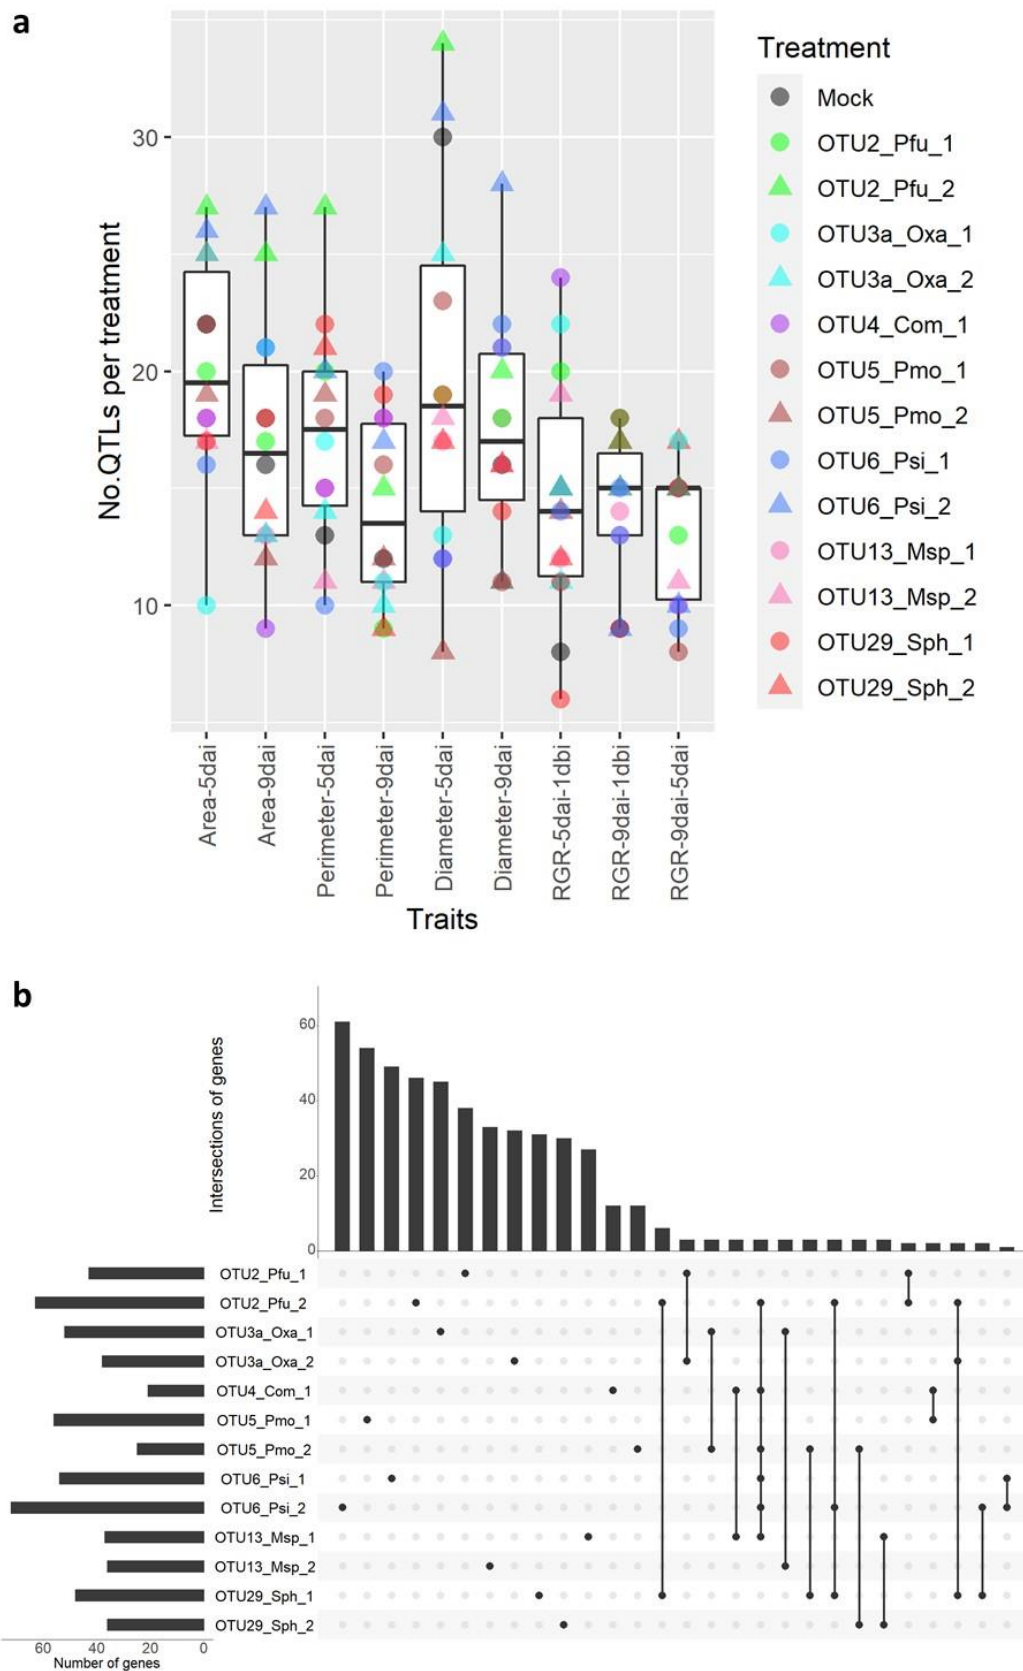

**Figure 5**

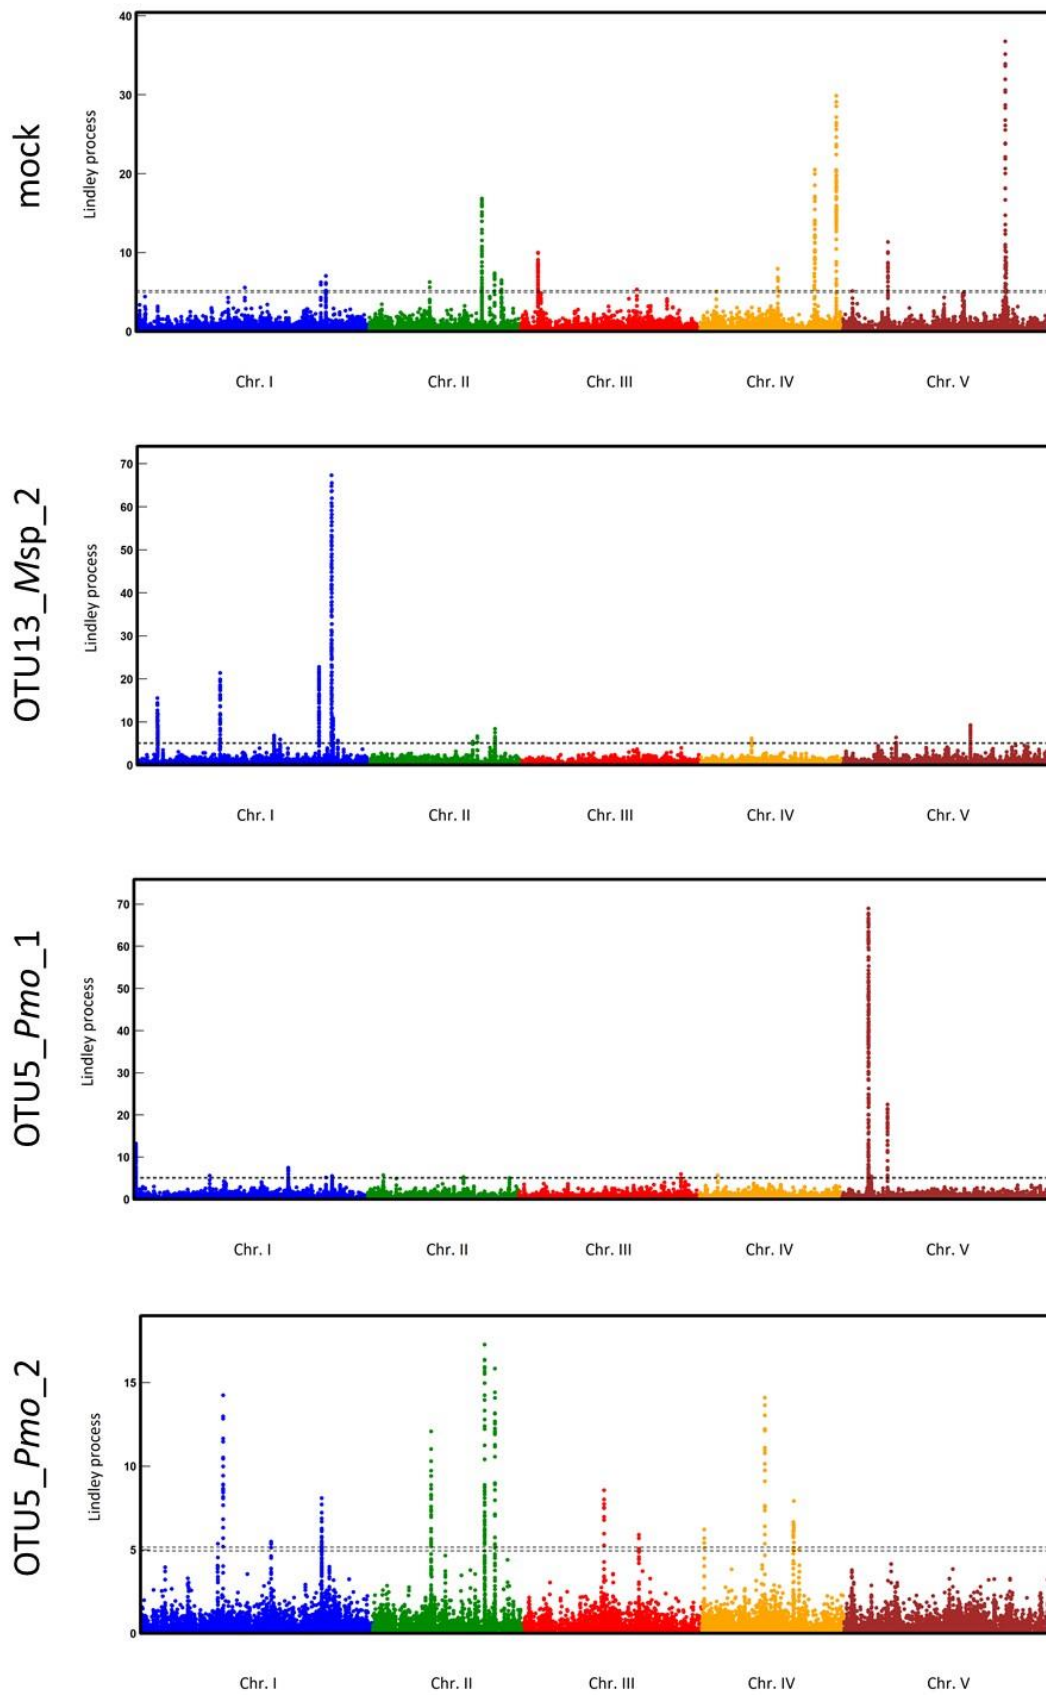

**Figure 6**

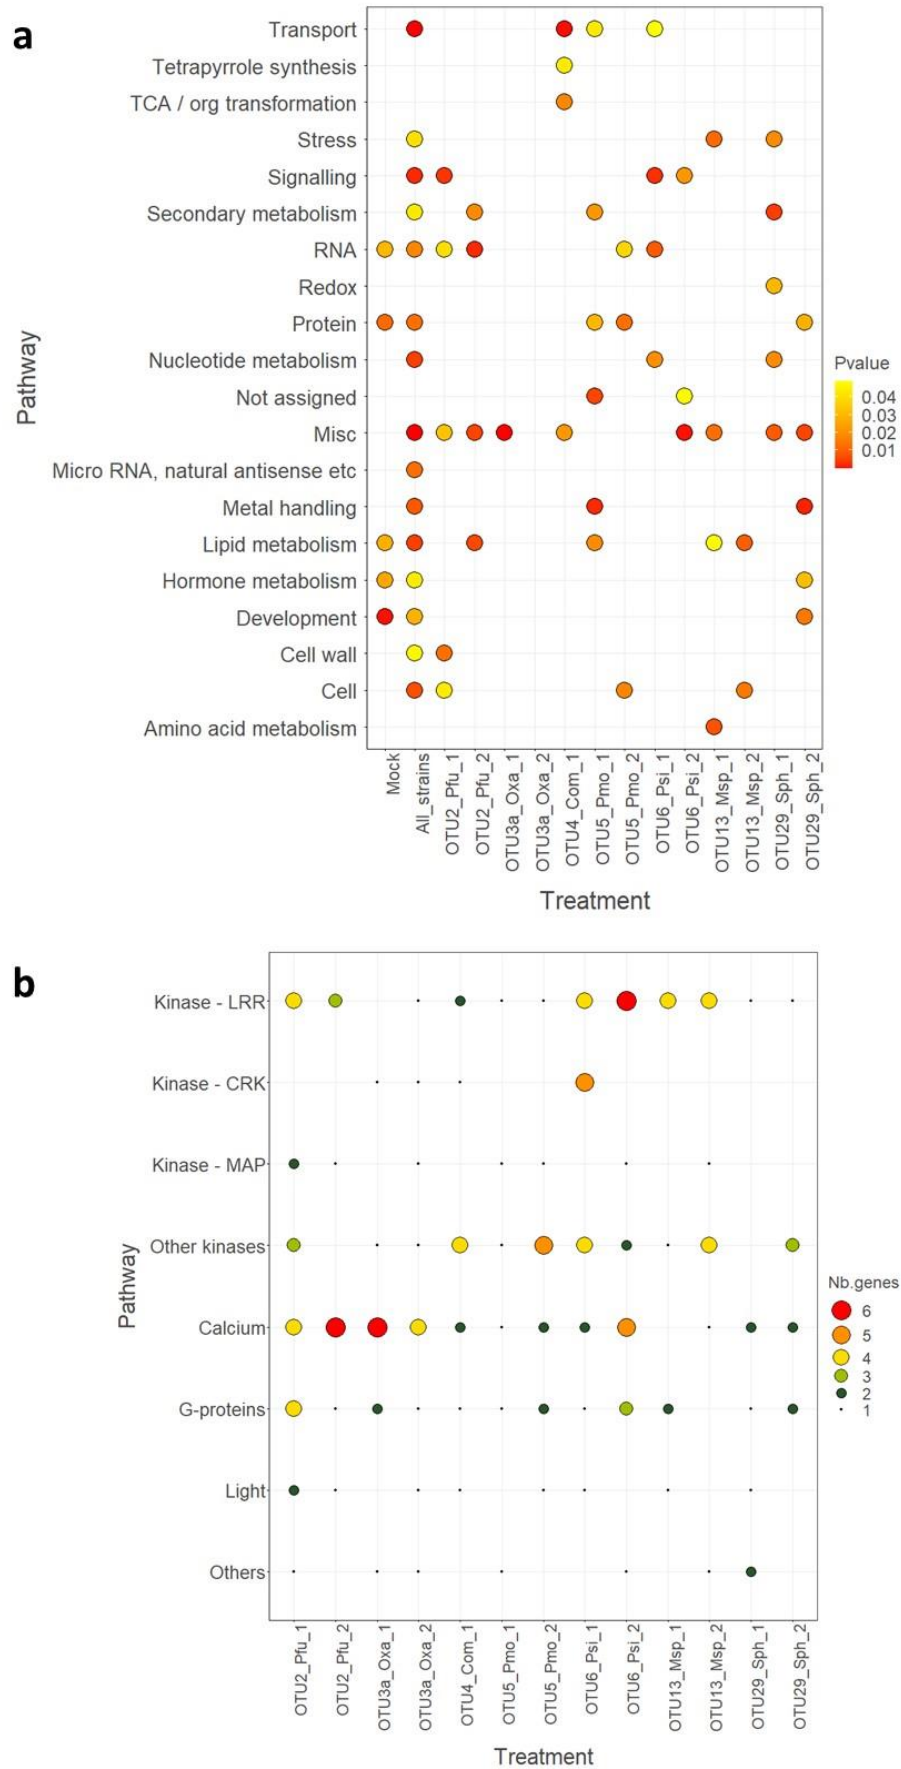

Source: https://www.biorxiv.org/content/biorxiv/early/2022/09/21/2022.09.19.508615.full.pdf
